# Supplementary material
Source: Springer Nature journal article supplement (https://www.springermedizin.de/resource/supplementary/13054_2010_9332_MOESM7_ESM.pdf/9705946)
Supplement: MOESM7 [file 9705946]

|        |                     | Regression coefficient $\beta$ | Standard error | p-value | Odds ratio (95% CI) |
|--------|---------------------|--------------------------------|----------------|---------|---------------------|
| No TBI | FFP:pRBC>1:2        | -0.36                          | 0.28           | 0.200   | 0.70 (0.04-1.21)    |
|        | RISC                | 0.75                           | 0.09           | <0.001  | 2.13 (1.77-2.56)    |
|        | Emergency operation | 0.09                           | 0.30           | 0.759   | 1.10 (0.61-1.98)    |
|        | Constant            | 0.02                           | 0.26           | 0.947   | 1.02                |
| TBI    | FFP:pRBC>1:2        | -0.73                          | 0.27           | 0.006   | 0.48 (0.29-0.81)    |
|        | RISC                | 0.56                           | 0.07           | <0.001  | 1.75 (1.52-2.02)    |
|        | Emergency operation | 0.45                           | 0.29           | 0.112   | 1.57 (0.90-2.75)    |
|        | Constant            | 0.14                           | 0.24           | 0.543   | 1.16                |
